# Supplementary material
Source: Springer Nature journal article supplement (https://www.springermedizin.de/resource/supplementary/13054_2010_9571_MOESM4_ESM.pdf/9706484)

# UCH-L1

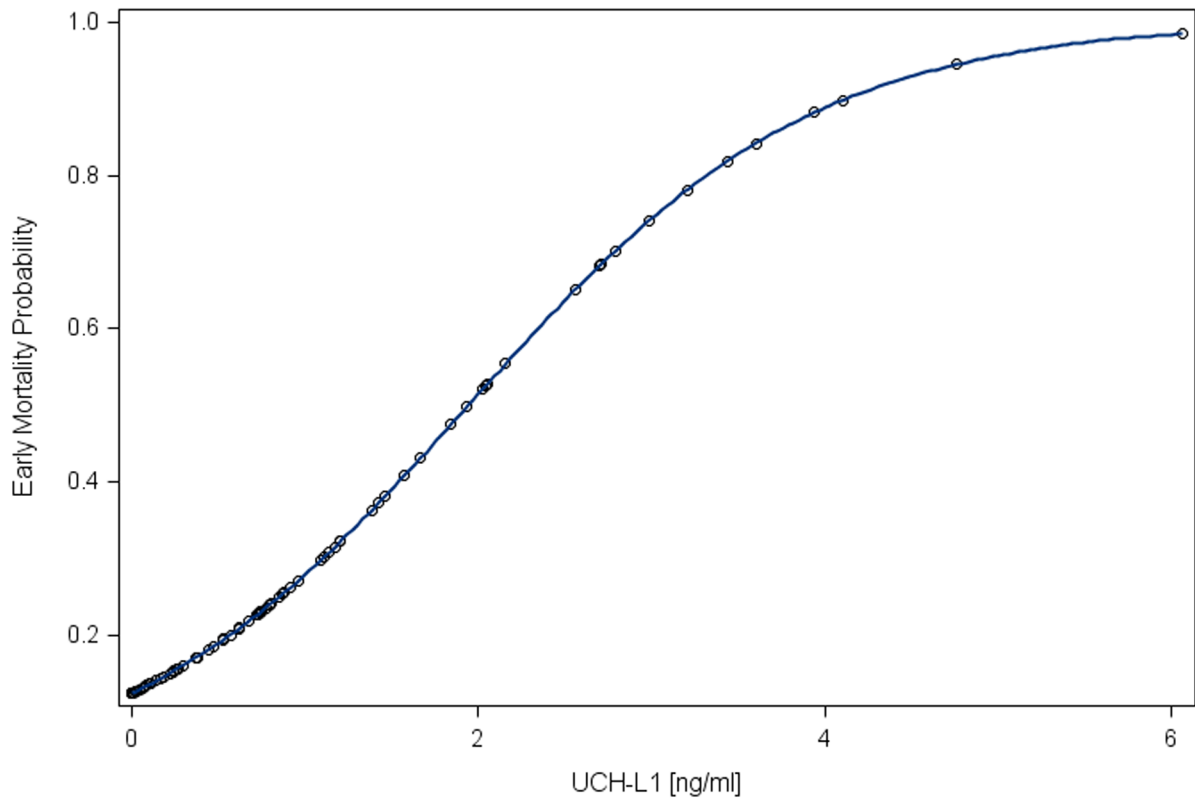

Supplement: MOESM4 [file 9706484]
